# Supplementary material
Source: Royal Society of Chemistry journal article supplement (doi:10.1039/d5tc04413h)
Supplement: d5tc04413h1.pdf [file d5tc04413h1.pdf]

## Supplementary Information

### Synthesis, Spectroscopic Characterizations and DFT Calculations of Two-Dimensional Monoclinic and Orthorhombic Phases of Metal–Organic Frameworks Based on BTC–2,2'-Bipyridine and Cu(II) Ions

Javier J. Santaella<sup>a,b</sup>, G. Marin<sup>b</sup>, Graciela Díaz de Delgado<sup>c</sup>, Robert A. Wheatley<sup>d</sup>, Dinesh P. Singh<sup>\*b</sup> and Gloria Cárdenas-Jirón<sup>\*a</sup>

<sup>a</sup> Laboratory of Theoretical Chemistry, Faculty of Chemistry and Biology, University of Santiago of Chile (USACH), Santiago, Chile

<sup>b</sup> Physics Department, Faculty of Science, University of Santiago of Chile (USACH), Avenida Victor Jara 3493, Estación Central, Santiago 9170124

<sup>c</sup> Crystallography Laboratory, Department of Chemistry, Faculty of Sciences, University of Los Andes, Mérida, Venezuela

<sup>d</sup> Institute of Physics, Pontifical Catholic University of Chile, Santiago, Chile

\*Author to whom the correspondence should be addressed

Email: [singh.dinesh@usach.cl](mailto:singh.dinesh@usach.cl), [gloria.cardenas@usach.cl](mailto:gloria.cardenas@usach.cl)

## Table of Contents

|                                                                                                                 |    |
|-----------------------------------------------------------------------------------------------------------------|----|
| <b>Figure S1.</b> ORTEP diagram of system <b>1</b> .....                                                        | S3 |
| <b>Table S1.</b> Bond distances (Å) for system <b>1</b> . ....                                                  | S3 |
| <b>Table S2.</b> Angles (°) for system <b>1</b> .....                                                           | S4 |
| <b>Table S3.</b> Dihedral angles (°) for system <b>1</b> .....                                                  | S4 |
| <b>Figure S2.</b> ORTEP diagram of system <b>2</b> .....                                                        | S5 |
| <b>Table S4.</b> Bond distances (Å) for system <b>2</b> . ....                                                  | S5 |
| <b>Table S5.</b> Angles (°) for system <b>2</b> . ....                                                          | S6 |
| <b>Table S6.</b> Dihedral angles (°) for system <b>2</b> .....                                                  | S6 |
| <b>Figure S3.</b> TGA curves for <b>1</b> and <b>2</b> .....                                                    | S7 |
| <b>Figure S4.</b> Diffraction patterns of a) <b>1</b> and b) <b>2</b> .....                                     | S7 |
| <b>Figure S5.</b> Cluster model extracted from the optimized crystal structure of each phase. ....              | S8 |
| <b>Figure S6.</b> Theoretical (red line) and experimental (black line) IR spectra of the system <b>1</b> . .... | S8 |

|                                                                                                                                                                                                                                                                       |     |
|-----------------------------------------------------------------------------------------------------------------------------------------------------------------------------------------------------------------------------------------------------------------------|-----|
| <b>Table S7.</b> Vibrational modes assigned by IR and Raman spectroscopy, and their corresponding theoretical values calculated for system <b>1</b> . .....                                                                                                           | S10 |
| <b>Table S8.</b> Vibrational modes assigned by IR and Raman spectroscopy, and their corresponding theoretical values calculated for system <b>2</b> . .....                                                                                                           | S12 |
| <b>Figure S10.</b> EPR spectrum of <b>1</b> and <b>2</b> . .....                                                                                                                                                                                                      | S15 |
| <b>Table S9.</b> Magnetic moment per atom type in systems <b>1</b> and <b>2</b> expressed in Bohr magneton units ( $\mu_B$ ). .....                                                                                                                                   | S16 |
| <b>Figure S11.</b> Theoretical electronic absorption spectra of <b>1</b> and <b>2</b> . .....                                                                                                                                                                         | S18 |
| <b>Table S10.</b> Valence and conduction band edges and band-gap ( $E_g$ ) values of MOFs <b>1</b> calculated using different exchange-correlation functionals. Band gap corrections (DFT1/2, Hubbard U) and spin magnetic moment ( $\mu_B$ ) are also included. .... | S18 |

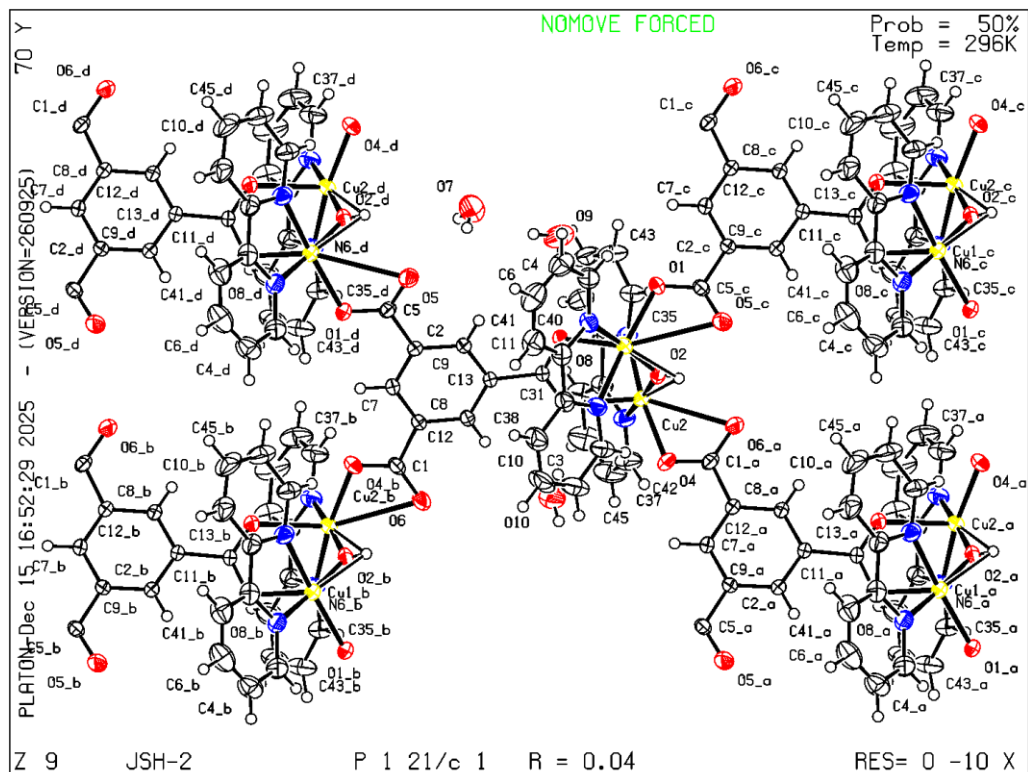

**Figure S1.** ORTEP diagram of system 1.

**Table S1.** Bond distances (Å) for system 1.

| Bond    | Value (Å)  | Bond    | Value (Å) | Bond    | Value (Å) |
|---------|------------|---------|-----------|---------|-----------|
| Cu1-O1  | 1.9619(13) | N16-C24 | 1.352(3)  | C10-H10 | 0.93      |
| Cu1-O2  | 1.8987(15) | N16-C30 | 1.336(3)  | C10-C38 | 1.375(4)  |
| Cu1-O8  | 2.2589(14) | N23-C25 | 1.350(3)  | C10-C45 | 1.355(4)  |
| Cu1-N10 | 2.0269(16) | N23-C42 | 1.336(3)  | C11-C13 | 1.514(2)  |
| Cu1-N16 | 2.0101(17) | C1-C8   | 1.504(2)  | C12-H12 | 0.93      |
| Cu2-O2  | 1.9066(16) | C2-C5   | 1.502(2)  | C12-C13 | 1.386(2)  |
| Cu2-O3  | 2.3167(13) | C2-C7   | 1.395(2)  | C21-C25 | 1.463(3)  |
| Cu2-O4  | 1.9910(13) | C2-C9   | 1.396(2)  | C21-C40 | 1.388(3)  |
| Cu2-N6  | 2.0284(16) | C3-H3   | 0.93      | C24-C27 | 1.465(3)  |
| Cu2-N23 | 2.0077(18) | C3-C31  | 1.379(4)  | C24-C41 | 1.388(3)  |
| O1-C5   | 1.270(2)   | C3-C37  | 1.370(4)  | C25C31  | 1.384(3)  |
| O2-H2   | 0.62(3)    | C4-H4   | 0.93      | C27-C38 | 1.394(3)  |
| O3-C11  | 1.260(2)   | C4-C6   | 1.371(4)  | C30-H30 | 0.93      |
| O4-C1   | 1.270(2)   | C4-C30  | 1.384(3)  | C31-H31 | 0.93      |
| O5-C5   | 1.244(2)   | C6-H6   | 0.93      | C32-H32 | 0.93      |
| O6-C1   | 1.232(2)   | C6-C41  | 1.367(4)  | C32-C45 | 1.384(3)  |
| O8-C11  | 1.258(2)   | C7-H7   | 0.93      | C35-H35 | 0.93      |
| N6-C21  | 1.345(3)   | C7-C8   | 1.392(2)  | C35-C43 | 1.377(3)  |
| N6-C35  | 1.335(3)   | C8-C12  | 1.397(2)  | C37-H37 | 0.93      |
| N10-C27 | 1.348(3)   | C9-H9   | 0.93      | C37-C42 | 1.389(4)  |
| N10-C32 | 1.341(3)   | C9-C13  | 1.391(2)  | C38-H38 | 0.93      |

**Table S2.** Angles (°) for system 1.

| Angle       | Value (°)  | Angle       | Value (°)  | Angle       | Value (°)  |
|-------------|------------|-------------|------------|-------------|------------|
| O2-Cu1-O1   | 93.22(6)   | C35-N6-C21  | 119.22(18) | C8-C7-C2    | 120.11(16) |
| O8-Cu1-O1   | 104.07(6)  | C27-N10-Cu1 | 114.12(14) | C8-C7-H7    | 119.95(10) |
| O8-Cu1-O2   | 91.31(6)   | C32-N10-Cu1 | 125.85(15) | C7-C8-C1    | 122.45(16) |
| N10-Cu1-O1  | 166.19(7)  | C32-N10-C27 | 119.17(19) | C12-C8-C1   | 118.05(15) |
| N10-Cu1-O2  | 94.58(7)   | C24-N16-Cu1 | 114.96(14) | C12-C8-C7   | 119.49(15) |
| N10-Cu1-O8  | 87.14(6)   | C30-N16-Cu1 | 125.78(15) | H9-C9-C2    | 119.57(10) |
| N16-Cu1-O1  | 91.47(6)   | C30-N16-C24 | 119.20(19) | C13-C9-C2   | 120.86(15) |
| N16-Cu1-O2  | 174.45(7)  | C25-N23-Cu2 | 113.92(13) | C13-C9-H9   | 119.57(10) |
| N16-Cu1-O8  | 90.42(6)   | C42-N23-Cu2 | 126.69(16) | C38-C10-H10 | 120.16(16) |
| N16-Cu1-N10 | 80.24(7)   | C42-N23-C25 | 119.0(2)   | C45-C10-H10 | 120.16(15) |
| O3-Cu2-O2   | 90.49(6)   | O6-C1-O4    | 123.55(17) | C45-C10-C38 | 119.7(2)   |
| O4-Cu2-O2   | 93.02(7)   | C8-C1-O4    | 117.33(16) | O8-C11-O3   | 125.85(15) |
| O4-Cu2-O3   | 102.45(5)  | C8-C1-O6    | 119.12(17) | C13-C11-O3  | 117.50(15) |
| N6-Cu2-O2   | 94.87(7)   | C7-C2-C5    | 121.31(15) | C13-C11-O8  | 116.65(15) |
| N6-Cu2-O3   | 88.95(6)   | C9-C2-C5    | 119.25(15) | H12-C12-C8  | 119.52(10) |
| N6-Cu2-O4   | 166.07(7)  | C9-C2-C7    | 119.41(15) | C13-C12-C8  | 120.97(15) |
| N23-Cu2-O2  | 174.67(7)  | C31-C3-H3   | 120.11(18) | C13-C12-H12 | 119.52(10) |
| N23-Cu2-O3  | 90.22(6)   | C37-C3-H3   | 120.11(16) | C11-C13-C9  | 120.04(14) |
| N23-Cu2-O4  | 91.99(7)   | C37-C3-C31  | 119.8(3)   | C12-C13-C9  | 119.00(15) |
| N23-Cu2-N6  | 79.86(7)   | C6-C4-H4    | 120.70(15) | C12-C13-C11 | 120.95(15) |
| C5-O1-Cu1   | 114.70(12) | C30-C4-H4   | 120.70(15) | C25-C21-N6  | 114.63(18) |
| Cu2-O2-Cu1  | 135.04(8)  | C30-C4-C6   | 118.6(2)   | C40-C21-N6  | 121.3(2)   |
| H2-O2-Cu1   | 113(3)     | O5-C5-O1    | 124.02(16) | C40-C21-C25 | 124.1(2)   |
| H2-O2-Cu2   | 111(3)     | C2-C5-O1    | 115.95(16) | C27-C24-N16 | 114.72(18) |
| C11-O3-Cu2  | 124.79(11) | C2-C5-O5    | 120.03(16) | C41-C24-N16 | 120.8(2)   |
| C1-O4-Cu2   | 112.41(12) | H6-C6-C4    | 120.03(15) | C41-C24-C27 | 124.4(2)   |
| C11-O8-Cu1  | 119.98(11) | C41-C6-C4   | 119.9(2)   | C21-C25-N23 | 114.83(19) |
| C21-N6-Cu2  | 113.28(13) | C41-C6-H6   | 120.03(16) | C31-C25-N23 | 122.0(2)   |
| C35-N6-Cu2  | 126.42(15) | H7-C7-C2    | 119.95(10) | C31-C25-C21 | 123.1(2)   |

**Table S3.** Dihedral angles (°) for system 1.

| Angle           | Value (°)   | Angle           | Value (°)   | Angle           | Value (°)   |
|-----------------|-------------|-----------------|-------------|-----------------|-------------|
| Cu1-O1-C5-O5    | -15.18(15)  | O1-C5-C2-C7     | -6.4(2)     | N16-C24-C27-C38 | -173.6(2)   |
| Cu1-O1-C5-C2    | 164.00(11)  | O1-C5-C2-C9     | 171.61(16)  | N16-C24-C41-C6  | 0.1(3)      |
| Cu1-O8-C11-O3   | -48.06(15)  | O3-C11-C13-C9   | -176.88(16) | N16-C30-C4-C6   | -0.6(3)     |
| Cu1-O8-C11-C13  | 131.71(12)  | O3-C11-C13-C12  | 1.8(2)      | N23-C25-C21-C40 | -178.6(2)   |
| Cu1-N10-C27-C24 | -10.42(15)  | O4-C1-C8-C7     | 17.6(2)     | N23-C25-C31-C3  | -2.2(3)     |
| Cu1-N10-C27-C38 | 168.43(16)  | O4-C1-C8-C12    | -163.69(18) | N23-C42-C37-C3  | -2.8(3)     |
| Cu1-N10-C32-C45 | -167.0(2)   | O5-C5-C2-C7     | 174.35(18)  | C1-C8-C7-C2     | 175.24(18)  |
| Cu1-N16-C24-C27 | 2.72(15)    | O5-C5-C2-C9     | -7.6(2)     | C1-C8-C12-C13   | -177.74(17) |
| Cu1-N16-C24-C41 | -177.32(17) | O6-C1-C8-C7     | -161.7(2)   | C2-C7-C8-C12    | -3.4(2)     |
| Cu1-N16-C30-C4  | 177.22(19)  | O6-C1-C8-C12    | 17.0(2)     | C2-C9-C13-C11   | 174.66(16)  |
| Cu2-O3-C11-O8   | -9.76(17)   | O8-C11-C13-C9   | 3.3(2)      | C2-C9-C13-C12   | -4.0(2)     |
| Cu2-O3-C11-C13  | 170.47(13)  | O8-C11-C13-C12  | -178.01(16) | C3-C31-C25-C21  | 175.2(2)    |
| Cu2-O4-C1-O6    | -1.59(18)   | N6-C21-C25-N23  | 2.2(2)      | C4-C6-C41-C24   | -0.3(3)     |
| Cu2-O4-C1-C8    | 177.67(12)  | N6-C21-C25-C31  | -175.4(2)   | C6-C41-C24-C27  | -179.9(2)   |
| Cu2-N6-C21-C25  | -15.02(15)  | N6-C21-C40-C39  | 2.2(3)      | C7-C8-C12-C13   | 1.0(2)      |
| Cu2-N6-C21-C40  | 165.75(16)  | N6-C35-C43-C39  | 2.0(3)      | C8-C12-C13-C9   | 2.7(2)      |
| Cu2-N6-C35-C43  | -166.3(2)   | N10-C27-C24-N16 | 5.2(2)      | C8-C12-C13-C11  | -175.95(17) |
| Cu2-N23-C25-C21 | 11.84(16)   | N10-C27-C24-C41 | -174.8(2)   | C10-C38-C27-C24 | 178.9(2)    |
| Cu2-N23-C25-C31 | -170.49(17) | N10-C27-C38-C10 | 0.1(3)      | C21-C40-C39-C43 | 0.9(3)      |
| Cu2-N23-C42-C37 | 172.1(2)    | N10-C32-C45-C10 | -0.4(3)     | C35-C43-C39-C40 | -2.9(3)     |

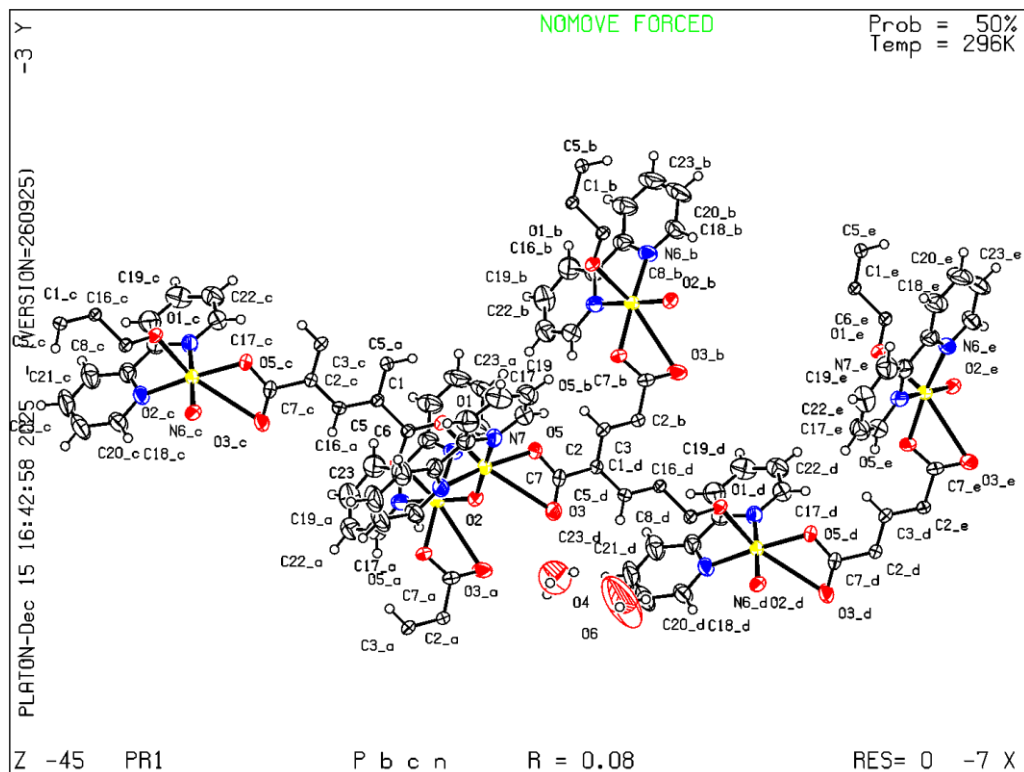

Figure S2. ORTEP diagram of system 2.

Table S4. Bond distances (Å) for system 2.

| Bond    | Value (Å) | Bond    | Value (Å) | Bond    | Value (Å) |
|---------|-----------|---------|-----------|---------|-----------|
| Cu1-O2  | 2.265(3)  | C7-C13  | 1.507(9)  | C6-H6   | 0.93      |
| Cu1-O3  | 1.957(3)  | C8-C14  | 1.386(6)  | C4-H4   | 0.93      |
| Cu1-O4  | 1.898(2)  | C8-H8   | 0.93      | C5-C2   | 1.405(11) |
| Cu1-N6  | 2.031(4)  | N9-C10  | 1.347(8)  | C5-H5   | 0.93      |
| Cu1-N9  | 2.003(5)  | N9-C3   | 1.338(7)  | C2-C9   | 1.359(10) |
| C12-C14 | 1.386(6)  | C10-C16 | 1.487(9)  | C2-H2   | 0.93      |
| C12-C14 | 1.386(6)  | C10-C5  | 1.359(10) | C1-H1   | 0.93      |
| C12-H12 | 0.93      | C11-C14 | 1.504(7)  | C9-H9   | 0.93      |
| O2-C13  | 1.252(4)  | C16-C1  | 1.378(9)  | O6-H6a  | 0.85      |
| O3-C11  | 1.277(6)  | C15-C6  | 1.363(12) | O6-H6b  | 0.85      |
| O5-C11  | 1.228(7)  | C15-C4  | 1.389(9)  | O1-H1a  | 0.85      |
| N6-C16  | 1.324(8)  | C15-H15 | 0.93      | O1-H1a  | 0.85      |
| N6-C4   | 1.335(8)  | C3-C9   | 1.384(10) | O1-H1b  | 0.85      |
| C7-C8   | 1.398(5)  | C3-H3   | 0.93      | O1-H1b  | 0.85      |
| C7-C8   | 1.398(5)  | C6-C1   | 1.392(11) | H1a-H1b | 1.1(2)    |

**Table S5.** Angles (°) for system **2**.

| Angle       | Value (°)  | Angle       | Value (°) | Angle      | Value (°) |
|-------------|------------|-------------|-----------|------------|-----------|
| O3-Cu1-O2   | 106.65(15) | H8-C8-C7    | 119.6(3)  | C9-C3-N9   | 122.1(6)  |
| O4-Cu1-O2   | 91.32(17)  | H8-C8-C14   | 119.6(3)  | H3-C3-N9   | 118.9(4)  |
| O4-Cu1-O3   | 91.70(15)  | C10-N9-Cu1  | 115.5(4)  | H3-C3-C9   | 118.9(4)  |
| N6-Cu1-O2   | 85.09(17)  | C3-N9-Cu1   | 125.6(4)  | C1-C6-C15  | 120.1(7)  |
| N6-Cu1-O3   | 165.5(2)   | C3-N9-C10   | 118.8(6)  | H6-C6-C15  | 119.9(4)  |
| N6-Cu1-O4   | 96.60(17)  | C16-C10-N9  | 113.6(6)  | H6-C6-C1   | 119.9(5)  |
| N9-Cu1-O2   | 92.08(17)  | C5-C10-N9   | 121.8(6)  | C15-C4-N6  | 121.7(7)  |
| N9-Cu1-O3   | 91.01(18)  | C5-C10-C16  | 124.6(6)  | H4-C4-N6   | 119.2(4)  |
| N9-Cu1-O4   | 174.87(15) | O5-C11-O3   | 123.9(5)  | H4-C4-C15  | 119.2(5)  |
| N9-Cu1-N6   | 79.9(2)    | C14-C11-O3  | 115.4(5)  | C2-C5-C10  | 119.3(7)  |
| C14-C12-C14 | 120.3(6)   | C14-C11-O5  | 120.6(4)  | H5-C5-C10  | 120.4(4)  |
| H12-C12-C14 | 119.9(3)   | O2-C13-O2   | 126.9(6)  | H5-C5-C2   | 120.4(5)  |
| H12-C12-C14 | 119.9(3)   | C7-C13-O2   | 116.5(3)  | C9-C2-C5   | 118.7(7)  |
| C13-O2-Cu1  | 124.3(3)   | C7-C13-O2   | 116.5(3)  | H2-C2-C5   | 120.6(5)  |
| C11-O3-Cu1  | 114.3(3)   | C8-C1-C12   | 119.8(5)  | H2-C2-C9   | 120.6(4)  |
| Cu1-O4-Cu1  | 135.4(3)   | C11-C14-C12 | 121.5(4)  | C6-C1-C16  | 117.6(8)  |
| C16-N6-Cu1  | 114.1(4)   | C11-C14-C8  | 118.7(4)  | H1-C1-C16  | 121.2(5)  |
| C4-N6-Cu1   | 125.0(5)   | C10-C16-N6  | 115.0(5)  | H1-C1-C6   | 121.2(5)  |
| C4-N6-C16   | 119.5(5)   | C1-C16-N6   | 122.6(6)  | C2-C9-C3   | 119.2(7)  |
| C8-C7-C8    | 118.4(6)   | C1-C16-C10  | 122.4(7)  | H9-C9-C3   | 120.4(4)  |
| C13-C7-C8   | 120.8(3)   | C4-C15-C6   | 118.4(7)  | H9-C9-C2   | 120.4(4)  |
| C13-C7-C8   | 120.8(3)   | H15-C15-C6  | 120.8(4)  | H6b-O6-H6a | 104.5     |
| C14-C8-C7   | 120.9(4)   | H15-C15-C4  | 120.8(5)  | H1a-O1-H1a | 171(28)   |

**Table S6.** Dihedral angles (°) for system **2**.

| Angle          | Value (°)   | Angle          | Value (°) | Angle         | Value (°) |
|----------------|-------------|----------------|-----------|---------------|-----------|
| Cu1-O2-C13-O2  | 27.8(6)     | C12-C14-C8-C7  | -0.9(5)   | N6-C16 C1 C6  | 1.9(7)    |
| Cu1-O2-C13-C7  | -152.17(19) | C12-C14-C11-O3 | 0.5(5)    | N6-C4-C15-C6  | -1.3(8)   |
| Cu1-O3-C11-O5  | 6.0(5)      | C12-C14-C11-O3 | 0.5(5)    | C7-C8-C14-C11 | -179.7(4) |
| Cu1-O3-C11-C14 | -173.7(4)   | C12-C14-C11-O5 | -179.2(5) | C7-C8-C14-C11 | 179.7(4)  |
| Cu1-N6-C16-C10 | 14.8(4)     | C12-C14-C11-O5 | -179.2(5) | N9-C10-C16-C1 | 174.6(6)  |
| Cu1-N6-C16-C1  | -167.3(5)   | O2-C13-C7-C8   | -5.4(3)   | N9-C10-C5-C2  | 1.9(7)    |
| Cu1-N6-C4-C15  | 165.4(6)    | O2-C13-C7-C8   | 174.6(3)  | N9-C3-C9-C2   | 0.1(8)    |
| Cu1-N9-C10-C16 | -3.8(4)     | O3-C11-C14-C8  | -178.2(5) | C10-C16-C1-C6 | 179.7(7)  |
| Cu1-N9-C10-C5  | 176.2(5)    | O5-C11-C14-C8  | 2.1(7)    | C10-C5-C2-C9  | -1.3(8)   |
| Cu1-N9-C3-C9   | -177.0(5)   | N6-C16-C10-N9  | -7.4(6)   | C16-C1-C6-C15 | -3.2(8)   |
| C12-C14-C8-C7  | 0.9(5)      | N6-C16-C10-C5  | 172.5(6)  | C3-C9-C2-C5   | 0.4(8)    |

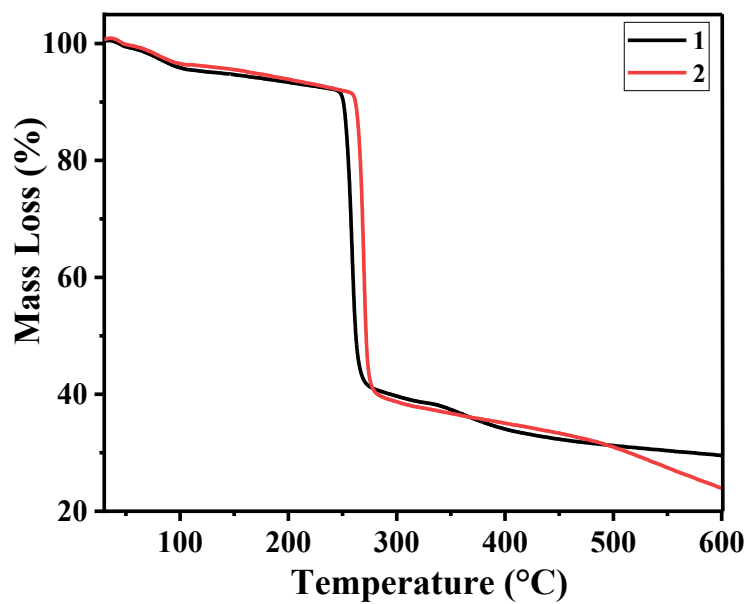

**Figure S3.** TGA curves for **1** and **2**.

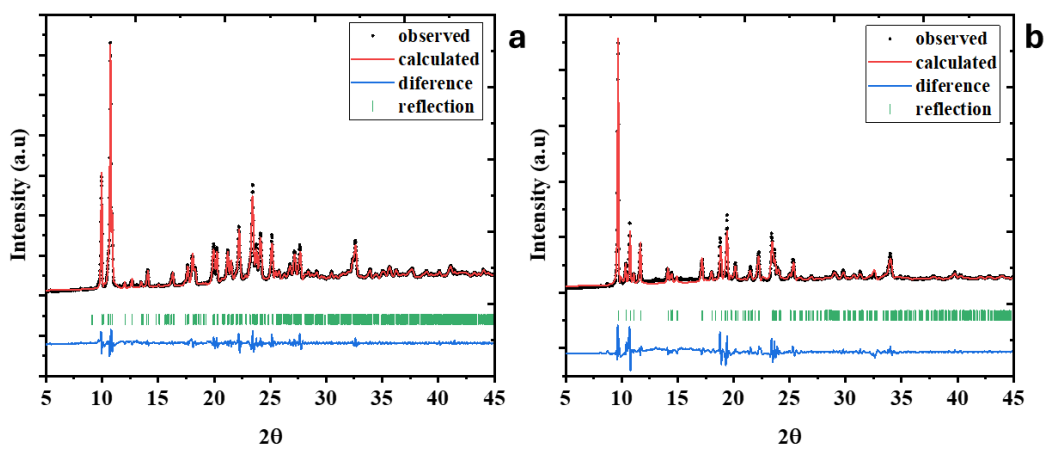

**Figure S4.** Diffraction patterns of a) **1** and b) **2**

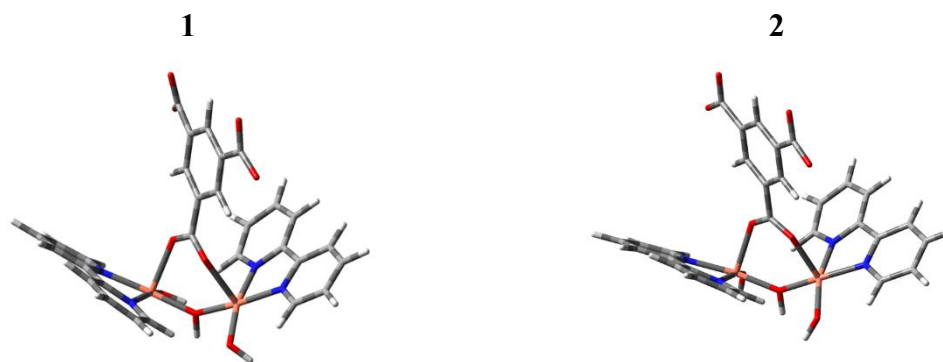

**Figure S5.** Cluster model extracted from the optimized crystal structure of each phase.

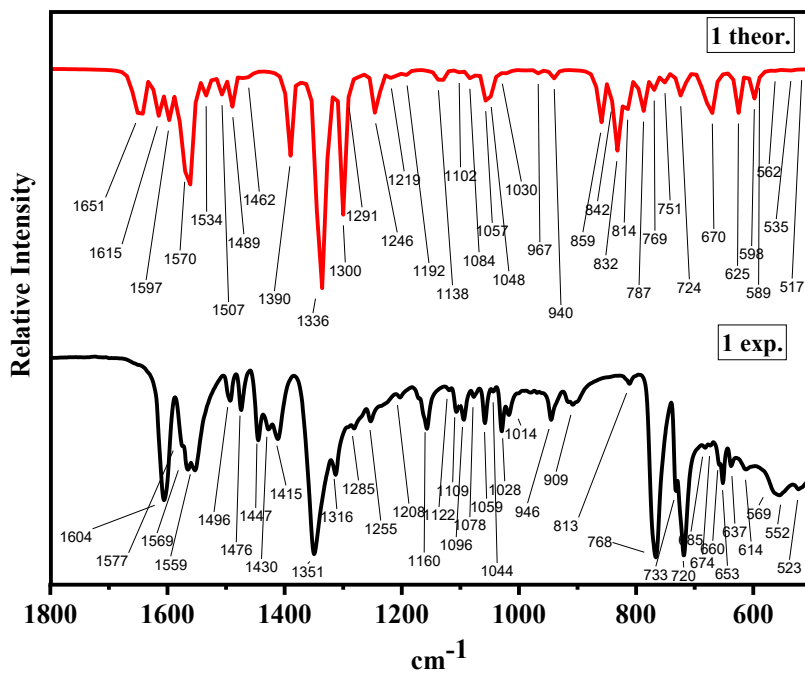

**Figure S6.** Theoretical (red line) and experimental (black line) IR spectra of the system **1**.

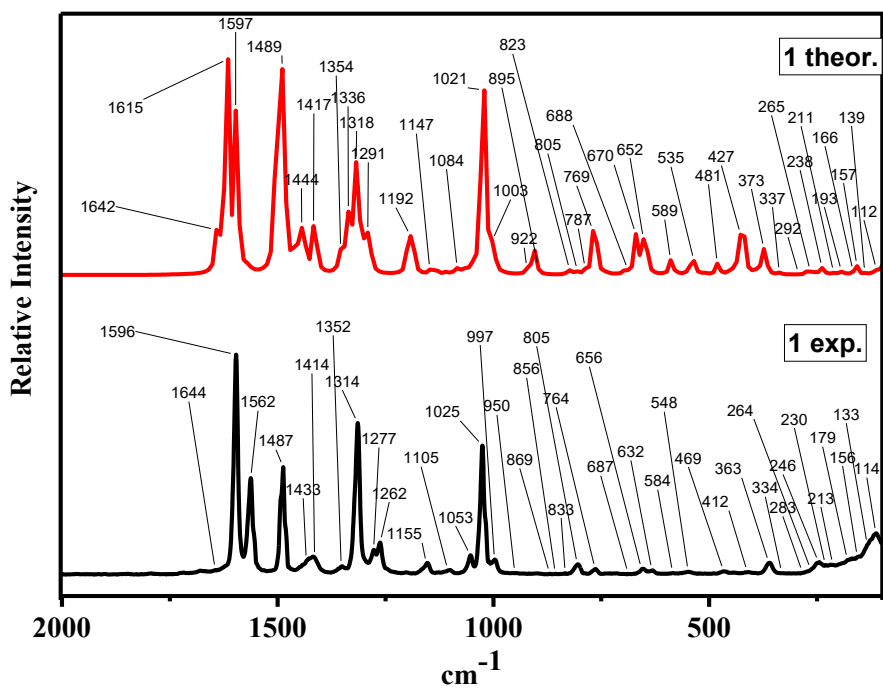

Figure S7. Theoretical (red line) and experimental (black line) Raman spectra of system 1.

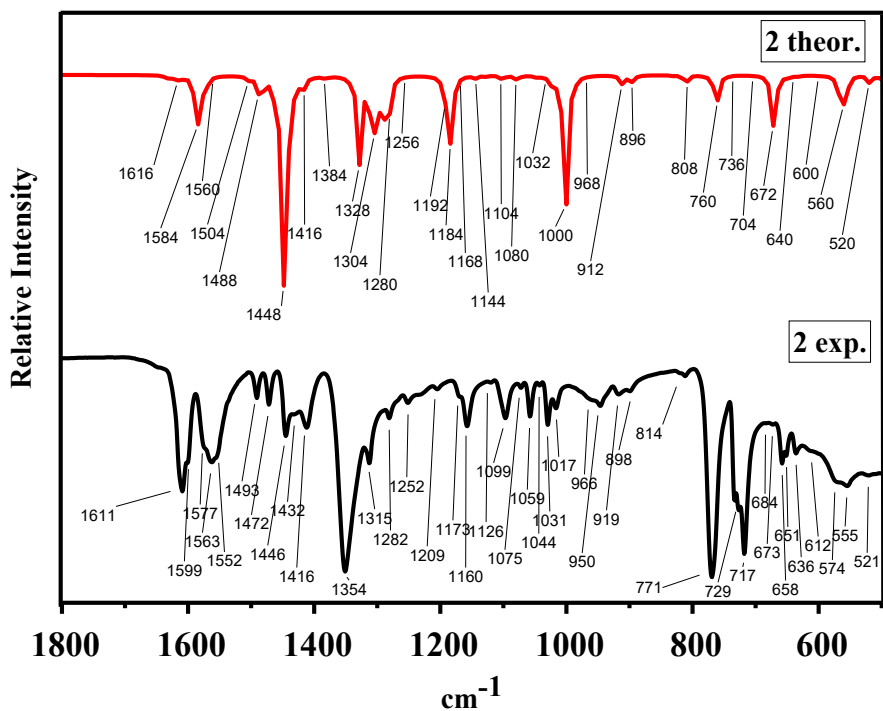

Figure S8. Theoretical (red line) and experimental (black line) IR spectra of the system 2.

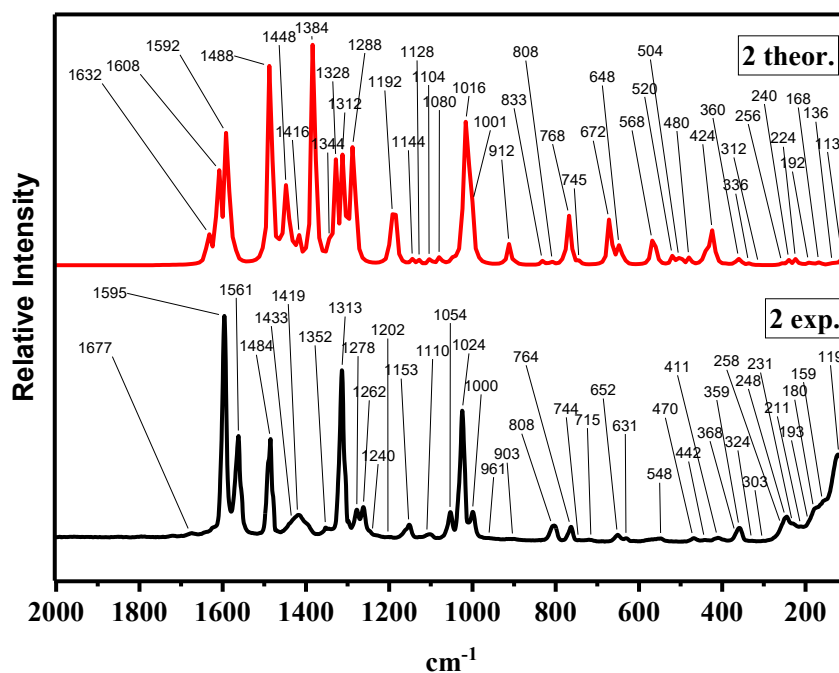

**Figure S9.** Theoretical (red line) and experimental (black line) Raman spectra of system **2**.

**Table S7** presents a comparison of the experimental frequency values obtained by infrared (IR) and Raman spectroscopy with the theoretical values calculated by DFT for **1**. The assignments corresponding to the characteristic vibrational modes of the functional groups present in the structure are included.

**Table S7.** Vibrational modes assigned by IR and Raman spectroscopy, and their corresponding theoretical values calculated for system **1**.

| IR exp. (cm <sup>-1</sup> ) | IR theor. (cm <sup>-1</sup> ) | Raman expe. (cm <sup>-1</sup> ) | Raman theor. (cm <sup>-1</sup> ) | Assignamen                                                                  |
|-----------------------------|-------------------------------|---------------------------------|----------------------------------|-----------------------------------------------------------------------------|
| 3453                        | -                             | -                               | -                                | $\nu$ (O-H), H <sub>2</sub> O                                               |
| 3370                        | 3325                          | -                               | 3533                             | $\nu$ (O-H) bridge                                                          |
| 3085                        | 3163                          | 3068                            | 3152                             | $\nu$ (C-H)                                                                 |
| 1604                        | 1651                          | 1644                            | 1642                             | $\nu$ (C=C) + $\nu$ (C=N) es 2,2'-bipy                                      |
| 1577                        | 1615                          | 1596                            | 1615                             | $\nu_{\text{as}}$ (C=O) + $\nu$ (C=C) + $\nu$ (C=N) R 2,2'-bipy             |
| 1569                        | 1597                          | 1562                            | 1597                             | $\nu_{\text{as}}$ (C=O) + $\nu$ (C=C) R BTC                                 |
| 1559                        | 1570                          | 1487                            | 1489                             | $\nu_{\text{as}}$ (C=O) + $\delta$ (C-H) R BTC                              |
| 1496                        | 1534                          | 1433                            | 1444                             | $\delta$ (C-H) R 2,2'-bipy + $\delta$ (C-H) R BTC                           |
| 1476                        | 1507                          | 1414                            | 1417                             | $\nu_{\text{as}}$ (C=O) + $\delta$ (C=C) R BTC + $\delta$ (C-H) R 2,2'-bipy |

|      |      |      |      |                                                                                                                                    |
|------|------|------|------|------------------------------------------------------------------------------------------------------------------------------------|
| 1447 | 1489 |      |      | $v_{as}(C=O) + \delta(C=C)$ R BTC + $\delta(C-H)$ R 2,2'-bipy                                                                      |
| 1430 | 1462 |      |      | $\delta(C-H)$ R 2,2'-bipy                                                                                                          |
| 1415 | 1390 |      |      | $\delta(C-H)$ R 2,2'-bipy, R BTC + $v(C-C)$ R 2,2'-bipy + $v(C-C)$ R BTC + $v_s(C=O)$                                              |
|      |      | 1352 | 1354 | $\delta(C-H)$ R 2,2'-bipy, R BTC + $v(C-C)$ R 2,2'-bipy + $v(C-C)$ R BTC + $v_s(C=O)$                                              |
| 1351 | 1336 | 1314 | 1336 | $v_s(C=O) + \delta(C-H)$ R 2,2'-bipy + $\delta(C=C)$ , (C=N) R 2,2'-bipy                                                           |
|      |      | 1277 | 1318 | $v_s(C=O) + \delta$ R BTC + $\delta(C-H)$ R 2,2'-bipy + $\delta(C=C)$ , (C=N) R 2,2'-bipy + $v(C-C)$ R 2,2'-bipy (C-C) R 2,2'-bipy |
| 1316 | 1300 |      |      | $\delta(C-H)$ R 2,2'-bipy, BTC + $v(C-C)$ R 2,2'-bipy                                                                              |
| 1285 | 1291 | 1262 | 1291 | $\delta$ R 2,2'-bipy                                                                                                               |
| 1255 | 1246 |      |      | $\delta(C-H)$ R BTC                                                                                                                |
| 1208 | 1219 |      |      | $\tau$ R BTC + $v(C-C)$ R BTC + $v_s(C=O)$                                                                                         |
| 1160 | 1192 | 1155 | 1192 | $v(C-C)$ R 2,2'-bipy                                                                                                               |
|      |      | 1105 | 1147 | $\delta(C-H)$ R 2,2'-bipy                                                                                                          |
| 1122 | 1138 |      |      | $\delta(C-H)$ R 2,2'-bipy                                                                                                          |
| 1109 | 1102 |      |      | $\delta(C-H)$ R 2,2'-bipy                                                                                                          |
| 1096 | 1084 | 1053 | 1084 | $\delta(O-H)$ bridge                                                                                                               |
| 1078 | 1057 |      |      | $\delta$ R BTC                                                                                                                     |
| 1059 | 1048 |      |      | $\delta(C-H)$ R 2,2'-bipy                                                                                                          |
| 1044 | 1030 |      |      | $\delta(C=C)$ , $\delta(C=N)$ R 2,2'-bipy + $\delta(C=C)$ R BTC                                                                    |
|      |      | 1025 | 1021 | $\delta(C=C)$ , $\delta(C=N)$ R 2,2'-bipy                                                                                          |
|      |      | 997  | 1003 | $\gamma(C-H)$ R BTC + $\gamma(C=C)$ , + $\gamma(C-H)$ , $\gamma(C=C)$ , (C=N) R 2,2'-bipy                                          |
| 1028 | 967  |      |      | $\gamma(C-H)$ R BTC                                                                                                                |
| 1014 | 940  |      |      | $\gamma(C-H)$ R 2,2'-bipy                                                                                                          |
|      |      | 950  | 922  | $\tau(C=C)$ R BTC + $v(C-C)$ R BTC                                                                                                 |
|      |      | 869  | 895  | $\tau$ R BTC + $v(C-C)$ R BTC                                                                                                      |
| 946  | 859  |      |      | $\gamma(C-H)$ R 2,2'-bipy                                                                                                          |
| 909  | 842  |      |      | $\gamma(C-H)$ R 2,2'-bipy                                                                                                          |
| 813  | 832  |      |      | $\gamma(C-H)$ R 2,2'-bipy                                                                                                          |
|      |      | 856  | 823  | $\gamma(C=C)$ , (C=O) R BTC                                                                                                        |
| 768  | 814  |      |      | $\gamma(C=C)$ , (C=O) R BTC                                                                                                        |
|      |      | 833  | 805  | $\gamma(C-H)$ R 2,2'-bipy                                                                                                          |
| 733  | 787  | 805  | 787  | $\gamma$ R BTC + $\tau$ R 2,2'-bipy                                                                                                |
| 720  | 769  | 764  | 769  | $\gamma(C-H)$ R 2,2'-bipy                                                                                                          |
| 685  | 751  |      |      | $\gamma(C=C)$ , (C=N) R 2,2'-bipy                                                                                                  |
| 674  | 724  |      |      | $\gamma(C=C)$ , (C=N) R 2,2'-bipy                                                                                                  |
|      |      | 687  | 688  | $\gamma(C=C)$ , R BTC                                                                                                              |
| 660  | 670  | 656  | 670  | $v(N-Cu) + \tau$ R 2,2'-bipy                                                                                                       |
| 653  | 625  |      |      | $v(Cu-OCO-Cu') + \tau$ R BTC                                                                                                       |
| 637  | 598  |      |      | $v_{as}(Cu-OH-Cu')$                                                                                                                |
| 614  | 589  |      |      | $\gamma(C=C)$ , (C=N) R 2,2'-bipy + $v_{as}(Cu-OH-Cu')$                                                                            |
|      |      | 584  | 589  | $v_{as}(Cu-OH-Cu')$                                                                                                                |
| 569  | 562  |      |      | $v(Cu-OCO-Cu') + \tau$ R BTC                                                                                                       |
| 552  | 535  | 548  | 535  | $v(Cu-OCO-Cu') + \tau$ R BTC + $v_{as}(Cu-OH-Cu')$                                                                                 |

|     |     |     |     |                                                                                                                |
|-----|-----|-----|-----|----------------------------------------------------------------------------------------------------------------|
| 523 | 517 |     |     | $\nu_{as}(\text{Cu-OCO-Cu}') + \tau \text{ R BTC}$                                                             |
|     |     | 469 | 481 | + $\gamma(\text{O-H})$ bridge                                                                                  |
|     |     | 412 | 427 | $\tau \text{ R } 2,2'\text{-bipy} + \tau \text{ R BTC}$                                                        |
|     |     | 363 | 373 | $\gamma \text{ R } 2,2'\text{-bipy} + \gamma(\text{OH}, \text{O}'\text{-Cu-N}, \text{N}') \text{ basal plane}$ |
|     |     | 334 | 357 | $\nu_{as}(\text{Cu-OCO-Cu}') + \tau \text{ R BTC}$                                                             |
|     |     | 283 | 292 | + $\gamma(\text{O-H})$ bridge                                                                                  |
|     |     | 264 | 265 | $\nu_s(\text{Cu-OCO-Cu}') + \nu_s(\text{Cu-OH-Cu}') + \tau \text{ R BTC}$                                      |
|     |     | 246 | 238 | + $\tau(\text{C=O}) \text{ R BTC} + \tau \text{ R } 2,2'\text{-bipy} + \tau(\text{Cu-N}) \text{ basal plane}$  |
|     |     | 230 | 211 | $\gamma(\text{Cu-N}) \text{ basal plane}$                                                                      |
|     |     | 213 | 193 | $\gamma(\text{Cu-N}) \text{ basal plane}$                                                                      |
|     |     | 179 | 166 | $\tau \text{ DCu} + \tau(\text{C=O}) \text{ R BTC}$                                                            |
|     |     | 156 | 157 | $\tau \text{ DCu}$                                                                                             |
|     |     | 133 | 139 | $\tau(\text{Cu-OH-Cu}) + \tau(\text{Cu-N}) \text{ basal plane}$                                                |
|     |     | 114 | 112 | $\tau(\text{Cu-N}) \text{ basal plane}$                                                                        |
|     |     |     |     | $\tau \text{ DCu} + \tau(\text{C=O}) \text{ R BTC}$                                                            |
|     |     |     |     | $\tau \text{ DCu} + \tau \text{ R BTC} + \tau \text{ R } 2,2'\text{-bipy}$                                     |

Abbreviations used in the assignment of vibrational modes:  $\nu$ , stretching mode;  $\delta$ , in-plane bending;  $\gamma$ , out-of-plane bending;  $\tau$ , torsion; as, antisymmetric vibration; s, symmetric vibration; sciss, twist; R-2,2'-bipy, 2,2'-bipyridine rings; R-BTC, BTC ring; DCu; dinuclear environment.

**Table S8.** Vibrational modes assigned by IR and Raman spectroscopy, and their corresponding theoretical values calculated for system 2.

| IR exp. (cm <sup>-1</sup> ) | IR theor. (cm <sup>-1</sup> ) | Raman expe. (cm <sup>-1</sup> ) | Raman theor. (cm <sup>-1</sup> ) | Assignamen                                                                                              |
|-----------------------------|-------------------------------|---------------------------------|----------------------------------|---------------------------------------------------------------------------------------------------------|
| 3453                        | -                             | -                               | -                                | $\nu(\text{O-H}), \text{H}_2\text{O}$                                                                   |
| 3370                        | 3325                          | -                               | 3533                             | $\nu(\text{O-H})$ bridge                                                                                |
| 3085                        | 3163                          | 3068                            | 3152                             | $\nu(\text{C-H})$                                                                                       |
|                             |                               | 1677                            | 1632                             | $\nu(\text{C=C}) + \nu(\text{C=N})$<br>es 2,2-bipy                                                      |
| 1611                        | 1616                          |                                 |                                  | $\nu(\text{C=C}) + \nu(\text{C=N})$<br>es 2,2-bipy                                                      |
| 1599                        | 1584                          | 1595                            | 1608                             | $\nu_{as}(\text{C=O}) + \nu(\text{C=C})$<br>+ $\nu(\text{C=N}) \text{ R } 2,2'\text{-bipy}$             |
| 1577                        | -                             | 1561                            | 1592                             | $\nu_{as}(\text{C=O}) + \nu(\text{C=C})$<br>R BTC                                                       |
| 1563                        | 1560                          | 1484                            | 1488                             | $\nu_{as}(\text{C=O}) + \delta(\text{C-H})$<br>R BTC                                                    |
| 1552                        | -                             | 1433                            | 1448                             | $\delta(\text{C-H}) \text{ R } 2,2'\text{-bipy}$<br>+ $\delta(\text{C-H}) \text{ R BTC}$                |
| 1493                        | 1504                          |                                 |                                  | $\delta(\text{C-H}) \text{ R } 2,2'\text{-bipy}$                                                        |
| 1472                        | 1488                          |                                 |                                  | $\nu_{as}(\text{C=O}) + \delta(\text{C=C})$<br>R BTC + $\delta(\text{C-H}) \text{ R } 2,2'\text{-bipy}$ |

|      |      |      |      |                                                                                                                                                                                                                                                                                                                                                                                                      |
|------|------|------|------|------------------------------------------------------------------------------------------------------------------------------------------------------------------------------------------------------------------------------------------------------------------------------------------------------------------------------------------------------------------------------------------------------|
| 1446 | 1448 |      |      | $\delta(\text{C-H})\text{R } 2,2'\text{-bipy}$                                                                                                                                                                                                                                                                                                                                                       |
| 1432 | -    |      |      | $\delta(\text{C-H})\text{R } 2,2'\text{-bipy},$<br>$\text{R BTC} + \nu(\text{C-C})\text{R}$<br>$2,2'\text{-bipy} + \nu(\text{C-C})$<br>$\text{R BTC} + \nu_s(\text{C=O})$<br>$\nu_{\text{as}}(\text{C=O}) + \delta(\text{C=C})$                                                                                                                                                                      |
| 1416 | 1416 | 1419 | 1416 | $\text{R BTC} + \delta(\text{C-H})\text{R}$<br>$2,2'\text{-bipy}$<br>$\delta(\text{C-H})\text{R } 2,2'\text{-bipy},$<br>$\text{R BTC} + \nu(\text{C-C})\text{R}$<br>$2,2'\text{-bipy} + \nu(\text{C-C})$<br>$\text{R BTC} + \nu_s(\text{C=O})$<br>$\nu_s(\text{C=O}) + \delta(\text{C-H})$<br>$\text{R } 2,2'\text{-bipy} + \nu$                                                                     |
| 1354 | 1384 | 1352 | 1384 | $(\text{C-C})\text{R } 2,2'\text{-bipy} +$<br>$\delta(\text{C=C}), (\text{C=N})\text{R}$<br>$2,2'\text{-bipy}$<br>$\nu_s(\text{C=O}) + \delta\text{R BTC}$<br>$+ \delta(\text{C-H})\text{R } 2,2'\text{-}$<br>$\text{bipy} + \delta(\text{C=C}),$<br>$(\text{C=N})\text{R } 2,2'\text{-bipy}$<br>$+ \nu(\text{C-C})\text{R } 2,2'\text{-}$<br>$\text{bipy}$                                          |
| 1315 | 1328 | 1278 | 1328 | $\delta\text{R } 2,2'\text{-bipy}$<br>$\nu(\text{C-C})\text{R } 2,2'\text{-bipy}$<br>$\nu(\text{C-C})\text{R } 2,2'\text{-bipy}$<br>$+ \delta\text{R } 2,2'\text{-bipy} + \delta$<br>$(\text{C-H})\text{R } 2,2'\text{-bipy}$<br>$\delta(\text{C-H})\text{R BTC}$                                                                                                                                    |
| 1282 | 1304 | 1262 | 1312 | $\tau\text{R BTC} + \nu(\text{C-C})\text{R}$<br>$\text{BTC} + \nu_s(\text{C=O})$                                                                                                                                                                                                                                                                                                                     |
| 1252 | 1280 | 1240 | 1288 | $\delta(\text{C-H})\text{R } 2,2'\text{-bipy}$<br>$\delta(\text{C-H})\text{R } 2,2'\text{-bipy}$<br>$\delta(\text{C-H})\text{R } 2,2'\text{-bipy}$<br>$\delta(\text{O-H})\text{bridge}$<br>$\delta\text{R BTC}$                                                                                                                                                                                      |
| 1209 | 1256 |      |      | $\delta(\text{C-H})\text{R } 2,2'\text{-bipy}$<br>$\delta(\text{C=O}), \delta(\text{C=N})\text{R}$<br>$2,2'\text{-bipy}$<br>$\gamma(\text{C-H})\text{R BTC} + \gamma$<br>$(\text{C=C}), + \gamma(\text{C-H}), \gamma$<br>$(\text{C=C}), (\text{C=N})\text{R}$<br>$2,2'\text{-bipy}$<br>$\delta(\text{C=C}), \delta(\text{C=N})\text{R}$<br>$2,2'\text{-bipy} + \delta(\text{C=C})$<br>$\text{R BTC}$ |
| 1173 | 1192 | 1202 | 1192 | $\gamma(\text{C-H})\text{R BTC}$                                                                                                                                                                                                                                                                                                                                                                     |
| 1160 | 1184 |      |      | $\gamma(\text{C-H})\text{R } 2,2'\text{-bipy}$                                                                                                                                                                                                                                                                                                                                                       |
| 1126 | 1168 |      |      | $\tau(\text{C=C})\text{R BTC} +$<br>$\nu(\text{C-C})\text{R BTC}$                                                                                                                                                                                                                                                                                                                                    |
| 1099 | 1144 | 1153 | 1144 | $\tau\text{R BTC} + \nu(\text{C-C})\text{R}$<br>$\text{BTC}$<br>$\gamma(\text{C-H})\text{R BTC} + \delta$<br>$(\text{C=C}), \delta(\text{C=N})\text{R}$<br>$2,2'\text{-bipy}$<br>$\gamma(\text{C-H})\text{R } 2,2'\text{-bipy}$<br>$\gamma(\text{C-H})\text{R } 2,2'\text{-bipy}$<br>$\gamma(\text{C=C}), (\text{C=O})\text{R}$<br>$\text{BTC}$                                                      |
| 1075 | 1104 |      |      |                                                                                                                                                                                                                                                                                                                                                                                                      |
| 1059 | 1080 | 1110 | 1128 |                                                                                                                                                                                                                                                                                                                                                                                                      |
|      |      | 1054 | 1104 |                                                                                                                                                                                                                                                                                                                                                                                                      |
| 1047 |      |      |      |                                                                                                                                                                                                                                                                                                                                                                                                      |
| 1031 | 1032 |      |      |                                                                                                                                                                                                                                                                                                                                                                                                      |
| 1017 | 1000 | 1024 | 1080 |                                                                                                                                                                                                                                                                                                                                                                                                      |
|      |      | 1000 | 1016 |                                                                                                                                                                                                                                                                                                                                                                                                      |
|      |      | 961  | 1001 |                                                                                                                                                                                                                                                                                                                                                                                                      |
| 966  | 968  |      |      |                                                                                                                                                                                                                                                                                                                                                                                                      |
| 950  | -    |      |      |                                                                                                                                                                                                                                                                                                                                                                                                      |
| 919  | 912  |      |      |                                                                                                                                                                                                                                                                                                                                                                                                      |
| 898  | 896  | 903  | 912  |                                                                                                                                                                                                                                                                                                                                                                                                      |

|     |     |     |     |                                                                      |
|-----|-----|-----|-----|----------------------------------------------------------------------|
| 814 | 808 |     |     | $\gamma$ (C=C), (C=O) R<br>BTC                                       |
|     |     | 808 | 833 | $\gamma$ (C-H) R 2,2'-bipy                                           |
|     |     | 764 | 808 | $\gamma$ R BTC + $\tau$ R 2,2'-<br>bipy                              |
| 771 | 760 |     |     | $\gamma$ (C-H) R 2,2'-bipy                                           |
| 729 | 736 |     |     | $\gamma$ (C-H) R 2,2'-bipy                                           |
|     |     | 744 | 768 | $\gamma$ (C-H) R 2,2'-bipy<br>+ $\gamma$ (C=C), (C=N) R<br>2,2'-bipy |
|     |     | 715 | 745 | $\gamma$ (C-H) R 2,2'-bipy<br>+ $\gamma$ (C=C), (C=N) R<br>2,2'-bipy |
| 717 | 704 |     |     | $\gamma$ (C=C), (C=N) R<br>2,2'-bipy                                 |
| 684 | -   |     |     | $\gamma$ (C=C), (C=N) R<br>2,2'-bipy                                 |
| 673 | 672 |     |     | $\gamma$ (C=C), R BTC                                                |
| 658 | -   | 652 | 672 | $\nu$ (N-Cu) + $\tau$ R 2,2'-<br>bipy                                |
| 651 | -   |     |     | $\nu$ (N-Cu) + $\tau$ R 2,2'-<br>bipy                                |
|     |     | 631 | 648 | $\nu_{as}$ (Cu-OH-Cu') + $\nu$<br>(Cu-OCO-Cu') + $\tau$ R<br>BTC     |
| 636 | 640 |     |     | $\nu$ (N-Cu) + $\tau$ R 2,2'-<br>bipy                                |
| 612 | 600 |     |     | $\nu_{as}$ (Cu-OH-Cu') + $\tau$<br>R BTC                             |
| 574 | -   |     |     | $\gamma$ (C=C), (C=N) R<br>2,2'-bipy                                 |
| 555 | 560 |     |     | $\nu_{as}$ (Cu-OH-Cu') + $\nu$<br>(Cu-OCO-Cu') + $\tau$ R<br>BTC     |
|     |     | 548 | 568 | $\nu_{as}$ (Cu-OH-Cu')<br>$\nu$ (Cu-OCO-Cu') + $\tau$<br>R BTC       |
| 521 | 520 |     |     | $\nu_{as}$ (Cu-OCO-Cu') +<br>$\tau$ R BTC                            |
|     |     |     |     | $\nu$ (Cu-OCO-Cu') + $\tau$<br>R BTC + $\gamma$ (O-H)<br>bridge      |
|     |     | 470 | 520 | $\tau$ R 2,2'-bipy + $\tau$ R<br>BTC                                 |
|     |     | 442 | 504 | $\gamma$ R 2,2'-bipy + $\gamma$<br>(OH,O'-Cu-N,N')<br>basal plane    |
|     |     | 411 | 480 | $\nu_s$ (Cu-OH-Cu')                                                  |
|     |     | 368 | 424 | $\nu_s$ (Cu-OCO-Cu') + $\tau$<br>R BTC                               |
|     |     | 359 | 360 | $\nu_{as}$ (Cu-OCO-Cu') +<br>$\tau$ (C=O) R BTC                      |
|     |     | 324 | 336 | $\gamma$ (Cu-N) basal plane                                          |
|     |     | 303 | 312 | $\gamma$ (Cu-N) basal plane                                          |
|     |     | 258 | 256 | $\gamma$ (Cu-OH-Cu)                                                  |
|     |     | 248 | 240 | $\gamma$ DCu                                                         |
|     |     | 231 | 224 | $\tau$ (Cu-OH-Cu)                                                    |
|     |     | 193 | 192 | $\tau$ (Cu-N) basal plane                                            |
|     |     | 180 | 168 | $\tau$ DCu + $\tau$ (C=O) R<br>BTC                                   |

159

136

 $\tau$  DCu +  $\tau$  R BTC +  $\tau$   
R 2,2'-bipy

119

113

 $\tau$  DCu basal plane+  $\tau$   
R BTC

Abbreviations used in the assignment of vibrational modes: stretching mode;  $\delta$ , in-plane bending;  $\gamma$ , out-of-plane bending;  $\tau$ , torsion; as, antisymmetric vibration; s, symmetric vibration; sciss, twist; R-2,2'-bipy, 2,2'-bipyridine rings; R-BTC, BTC ring; DCu; dinuclear environment.

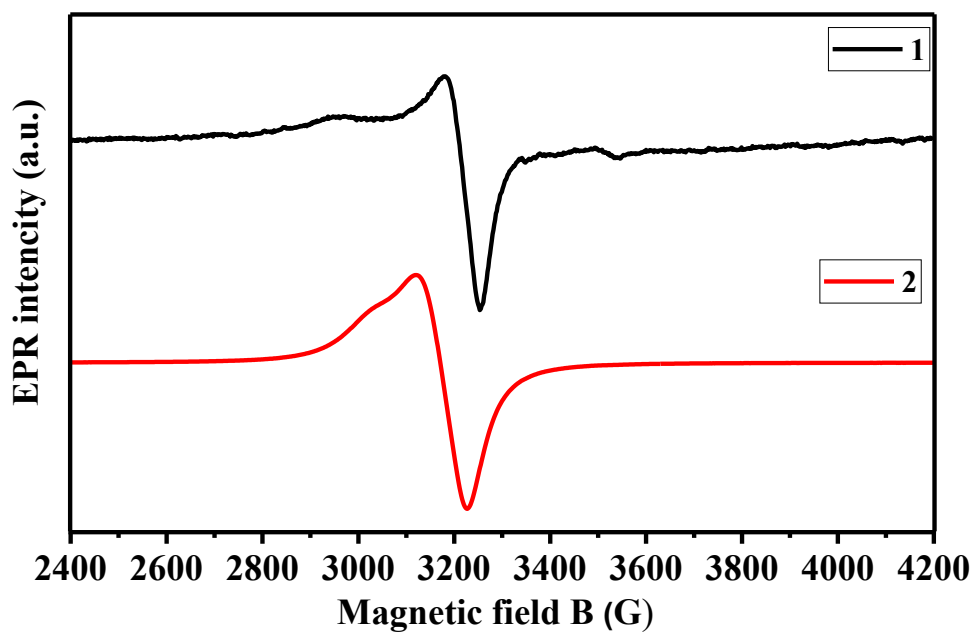

Figure S10. EPR spectrum of 1 and 2.

**Table S9.** Magnetic moment per atom type in systems **1** and **2** expressed in Bohr magneton units ( $\mu_B$ ).

| 1  |         |                                  | 2  |         |                                  | Type of bond with respect to Cu (II) atom |                                           |
|----|---------|----------------------------------|----|---------|----------------------------------|-------------------------------------------|-------------------------------------------|
| N° | Element | Spin Magnetic Moment ( $\mu_B$ ) | N° | Element | Spin Magnetic Moment ( $\mu_B$ ) |                                           |                                           |
| 1  | Cu      | 0.817                            | 1  | Cu      | 0.823                            |                                           |                                           |
| 2  | Cu      | 0.816                            | 2  | Cu      | 0.822                            |                                           |                                           |
| 3  | Cu      | 0.817                            | 3  | Cu      | 0.822                            |                                           |                                           |
| 4  | Cu      | 0.816                            | 4  | Cu      | 0.821                            | Cu atom                                   |                                           |
| 5  | Cu      | 0.816                            | 5  | Cu      | 0.822                            |                                           |                                           |
| 6  | Cu      | 0.814                            | 6  | Cu      | 0.821                            |                                           |                                           |
| 7  | Cu      | 0.814                            | 7  | Cu      | 0.822                            |                                           |                                           |
| 8  | Cu      | 0.813                            | 8  | Cu      | 0.822                            |                                           |                                           |
| 12 | O       | 0.105                            | 40 | O       | 0.108                            |                                           | O Bridges                                 |
| 13 | O       | 0.108                            | 41 | O       | 0.109                            |                                           |                                           |
| 14 | O       | 0.107                            | 42 | O       | 0.107                            |                                           |                                           |
| 15 | O       | 0.108                            | 43 | O       | 0.109                            |                                           |                                           |
| 8  | O       | 0.039                            | 24 | O       | 0.046                            | O Coordinated to the square base plane    |                                           |
| 9  | O       | 0.043                            | 25 | O       | 0.047                            |                                           |                                           |
| 10 | O       | 0.042                            | 26 | O       | 0.047                            |                                           |                                           |
| 11 | O       | 0.042                            | 27 | O       | 0.046                            |                                           |                                           |
| 24 | O       | 0.040                            | 28 | O       | 0.047                            |                                           |                                           |
| 25 | O       | 0.041                            | 29 | O       | 0.047                            |                                           |                                           |
| 26 | O       | 0.042                            | 30 | O       | 0.046                            |                                           |                                           |
| 27 | O       | 0.041                            | 31 | O       | 0.046                            |                                           |                                           |
| 28 | O       | 0.002                            | 44 | O       | 0.001                            |                                           | O Not Coordinated in a square-based plane |
| 29 | O       | 0.002                            | 45 | O       | 0.001                            |                                           |                                           |
| 30 | O       | 0.002                            | 46 | O       | 0.001                            |                                           |                                           |
| 31 | O       | 0.002                            | 47 | O       | 0.001                            |                                           |                                           |
| 32 | O       | 0.002                            | 48 | O       | 0.001                            |                                           |                                           |
| 33 | O       | 0.002                            | 49 | O       | 0.001                            |                                           |                                           |
| 34 | O       | 0.002                            | 50 | O       | 0.001                            |                                           |                                           |
| 35 | O       | 0.002                            | 51 | O       | 0.001                            |                                           |                                           |
| 40 | N       | 0.044                            | 32 | N       | 0.038                            | N Coordinated in a square-based plane     |                                           |
| 41 | N       | 0.043                            | 33 | N       | 0.038                            |                                           |                                           |
| 42 | N       | 0.044                            | 34 | N       | 0.039                            |                                           |                                           |
| 43 | N       | 0.044                            | 35 | N       | 0.039                            |                                           |                                           |
| 44 | N       | 0.046                            | 36 | N       | 0.039                            |                                           |                                           |
| 45 | N       | 0.044                            | 37 | N       | 0.039                            |                                           |                                           |
| 46 | N       | 0.044                            | 38 | N       | 0.039                            |                                           |                                           |
| 47 | N       | 0.045                            | 39 | N       | 0.039                            |                                           |                                           |
| 48 | N       | 0.052                            | 72 | N       | 0.046                            |                                           |                                           |
| 49 | N       | 0.051                            | 73 | N       | 0.046                            |                                           |                                           |
| 50 | N       | 0.051                            | 74 | N       | 0.047                            |                                           |                                           |

|       |   |        |    |   |        |                       |
|-------|---|--------|----|---|--------|-----------------------|
| 51    | N | 0.052  | 75 | N | 0.047  |                       |
| 52    | N | 0.053  | 76 | N | 0.047  |                       |
| 53    | N | 0.052  | 77 | N | 0.046  |                       |
| 54    | N | 0.051  | 78 | N | 0.047  |                       |
| 55    | N | 0.052  | 79 | N | 0.046  |                       |
| <hr/> |   |        |    |   |        |                       |
| 56    | C | -0.005 | 88 | C | -0.005 |                       |
| 57    | C | -0.005 | 89 | C | -0.005 |                       |
| 58    | C | -0.005 | 90 | C | -0.005 |                       |
| 59    | C | -0.005 | 91 | C | -0.005 | C- carboxylate in the |
| 80    | C | -0.004 | 92 | C | -0.005 | square base plane     |
| 81    | C | -0.004 | 93 | C | -0.005 |                       |
| 82    | C | -0.004 | 94 | C | -0.005 |                       |
| 83    | C | -0.004 | 95 | C | -0.005 |                       |
| <hr/> |   |        |    |   |        |                       |
| 20    | O | 0.002  | 16 | O | 0.001  |                       |
| 21    | O | 0.002  | 17 | O | 0.001  |                       |
| 22    | O | 0.002  | 18 | O | 0.001  |                       |
| 23    | O | 0.002  | 19 | O | 0.001  |                       |
| 36    | O | 0.001  | 20 | O | 0.001  | O equatorial          |
| 37    | O | 0      | 21 | O | 0.001  |                       |
| 38    | O | 0      | 22 | O | 0.001  |                       |
| 39    | O | 0      | 23 | O | 0.001  |                       |
| <hr/> |   |        |    |   |        |                       |

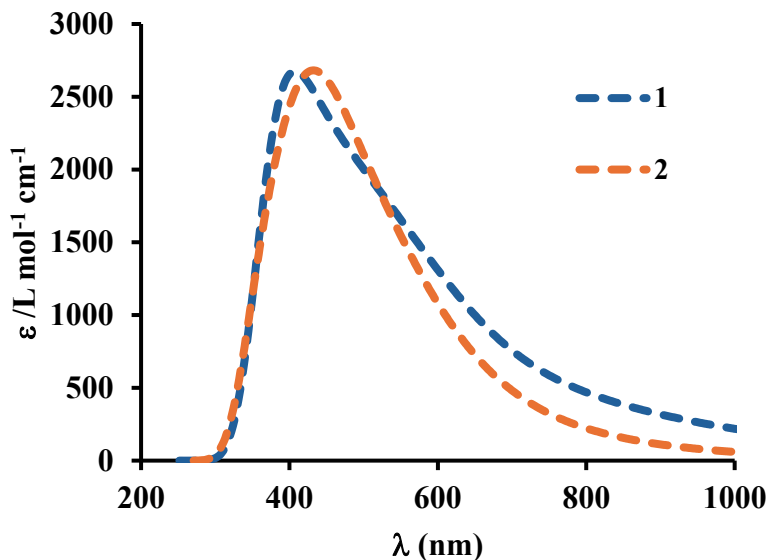

**Figure S11.** Theoretical electronic absorption spectra of **1** and **2**.

**Table S10.** Valence and conduction band edges and band-gap ( $E_g$ ) values of MOFs **1** calculated using different exchange-correlation functionals. Band gap corrections (DFT1/2, Hubbard U) and spin magnetic moment ( $\mu_B$ ) are also included.

| Functional | Valence Band (eV) | Conduction Band (eV) | $E_g$ (eV) <sup>a</sup> | Spin Magnetic Moment ( $\mu_B$ ) per atom Cu |
|------------|-------------------|----------------------|-------------------------|----------------------------------------------|
| HSE06      | -0.54             | 0.54                 | 1.08                    | 0.00                                         |
| HLE16      | -1.21             | 1.14                 | 2.35                    | -0.74                                        |
| PBE-DFT1/2 | -0.25             | 0.25                 | 0.50                    | 0.00                                         |
| PBE0       | -0.75             | 0.74                 | 1.49                    | 0.00                                         |
| PBE        | -0.32             | 0.32                 | 0.64                    | 0.00                                         |
| PBE, U=4   | -0.81             | 0.78                 | 1.59                    | 0.64                                         |
| PBE, U=7   | -0.85             | 0.85                 | 1.70                    | 0.75                                         |
| PBE,U=9    | -0.94             | 0.86                 | 1.80                    | 0.81                                         |
| PBE,U=11   | -0.95             | 0.87                 | 1.82                    | 0.86                                         |
| PBE,U=13   | -0.95             | 0.87                 | 1.82                    | 0.90                                         |
| PBE,U=15   | -0.06             | 0.15                 | 0.21                    | 0.14                                         |

<sup>a</sup>Experimental band gap is 2.21 eV.
